# Supplementary material for: Integrative Analysis Constructs an Extracellular Matrix-Associated Gene Signature for the Prediction of Survival and Tumor Immunity in Lung Adenocarcinoma
Source: Front Cell Dev Biol. 2022 Apr 26;10:835043. doi: 10.3389/fcell.2022.835043 (PMC9086365; doi:10.3389/fcell.2022.835043)
Supplement: Supplementary file 6 [file Table4.XLSX]

## Sheet: Sheet1
id	risk
TCGA-44-7660	low
TCGA-78-8662	high
TCGA-97-A4M6	low
TCGA-MP-A4SV	high
TCGA-38-4627	high
TCGA-93-A4JO	low
TCGA-05-4426	high
TCGA-97-7937	high
TCGA-62-A472	low
TCGA-49-6743	low
TCGA-50-6597	high
TCGA-55-A490	high
TCGA-99-8032	low
TCGA-55-8299	high
TCGA-64-1676	low
TCGA-86-8279	high
TCGA-97-A4M5	low
TCGA-78-7536	high
TCGA-55-8208	low
TCGA-95-7562	high
TCGA-MP-A4TK	high
TCGA-49-6761	high
TCGA-50-6593	high
TCGA-55-7728	high
TCGA-86-8055	high
TCGA-73-4668	high
TCGA-55-8090	high
TCGA-38-7271	low
TCGA-55-8514	low
TCGA-50-5932	high
TCGA-95-A4VN	high
TCGA-86-7954	low
TCGA-91-A4BC	low
TCGA-MP-A4TJ	low
TCGA-44-6146	low
TCGA-62-A470	low
TCGA-55-7911	low
TCGA-50-8460	low
TCGA-55-6981	high
TCGA-44-8120	low
TCGA-55-8614	high
TCGA-64-1677	high
TCGA-97-8552	low
TCGA-69-8253	high
TCGA-86-8668	low
TCGA-86-8074	high
TCGA-50-5066	high
TCGA-55-8092	low
TCGA-NJ-A4YQ	low
TCGA-55-6983	low
TCGA-62-8394	high
TCGA-44-2661	low
TCGA-44-7659	low
TCGA-55-6712	high
TCGA-05-4403	high
TCGA-97-7553	low
TCGA-78-8655	low
TCGA-55-7724	low
TCGA-73-4659	low
TCGA-50-6673	high
TCGA-78-7542	high
TCGA-38-4625	high
TCGA-55-7570	high
TCGA-69-7979	high
TCGA-55-A4DF	high
TCGA-67-3773	low
TCGA-55-7573	low
TCGA-50-5068	low
TCGA-49-AARN	high
TCGA-78-7150	high
TCGA-MP-A4TA	high
TCGA-55-7907	high
TCGA-55-7574	high
TCGA-86-8073	low
TCGA-L9-A7SV	low
TCGA-93-A4JP	low
TCGA-78-7163	low
TCGA-NJ-A55R	low
TCGA-97-A4M7	low
TCGA-38-A44F	high
TCGA-62-8399	high
TCGA-49-4514	low
TCGA-44-6775	low
TCGA-44-5643	high
TCGA-44-6147	low
TCGA-J2-A4AE	low
TCGA-44-2657	low
TCGA-78-7158	low
TCGA-93-7347	low
TCGA-38-4630	high
TCGA-86-7953	low
TCGA-50-5072	high
TCGA-62-A46S	low
TCGA-53-A4EZ	low
TCGA-69-7973	high
TCGA-55-8204	low
TCGA-35-5375	high
TCGA-78-7539	low
TCGA-95-A4VK	high
TCGA-50-5055	low
TCGA-44-7667	high
TCGA-MP-A4TI	high
TCGA-55-6979	low
TCGA-55-7284	high
TCGA-44-2656	low
TCGA-44-6778	low
TCGA-35-4123	high
TCGA-44-6776	high
TCGA-73-4676	high
TCGA-86-8673	low
TCGA-62-8395	low
TCGA-44-A4SS	high
TCGA-86-8358	high
TCGA-55-6968	high
TCGA-99-AA5R	low
TCGA-55-8085	low
TCGA-44-8117	high
TCGA-55-8506	low
TCGA-NJ-A7XG	low
TCGA-05-4384	high
TCGA-64-1679	high
TCGA-73-4666	high
TCGA-55-8616	high
TCGA-93-7348	low
TCGA-55-1594	low
TCGA-73-4658	high
TCGA-55-8505	high
TCGA-MP-A4T4	low
TCGA-49-4506	high
TCGA-97-8172	low
TCGA-O1-A52J	low
TCGA-78-7537	low
TCGA-73-4662	low
TCGA-62-8398	high
TCGA-49-AAQV	low
TCGA-55-8621	low
TCGA-53-7626	low
TCGA-44-7669	high
TCGA-93-8067	high
TCGA-97-A4M2	low
TCGA-05-4425	high
TCGA-69-7763	low
TCGA-86-8056	low
TCGA-44-2662	high
TCGA-50-5931	high
TCGA-55-8512	low
TCGA-50-5930	low
TCGA-L9-A743	high
TCGA-50-5939	high
TCGA-78-7161	low
TCGA-44-3398	high
TCGA-97-8547	high
TCGA-91-6847	high
TCGA-55-8511	low
TCGA-50-5944	low
TCGA-55-1592	low
TCGA-50-8457	low
TCGA-78-7159	low
TCGA-67-6215	high
TCGA-MP-A4T9	high
TCGA-97-7938	low
TCGA-05-5425	low
TCGA-55-7913	low
TCGA-05-4417	low
TCGA-05-4434	high
TCGA-55-8096	high
TCGA-49-6767	high
TCGA-44-2666	low
TCGA-MP-A4T6	low
TCGA-MP-A4TE	high
TCGA-50-5946	high
TCGA-99-7458	low
TCGA-91-6840	high
TCGA-55-6986	high
TCGA-44-7672	high
TCGA-97-8175	high
TCGA-55-8087	low
TCGA-78-7160	low
TCGA-L4-A4E5	high
TCGA-97-A4LX	low
TCGA-86-8359	high
TCGA-44-6145	low
TCGA-78-7155	high
TCGA-55-7816	low
TCGA-99-8025	high
TCGA-44-A47G	high
TCGA-55-8615	high
TCGA-73-7499	high
TCGA-86-7711	high
TCGA-86-8075	high
TCGA-86-7955	high
TCGA-05-4415	high
TCGA-91-6830	high
TCGA-49-6745	high
TCGA-86-A4P7	low
TCGA-44-4112	low
TCGA-55-6975	high
TCGA-95-7039	high
TCGA-05-4432	low
TCGA-49-4487	high
TCGA-55-7727	low
TCGA-73-A9RS	low
TCGA-55-7914	low
TCGA-62-A46R	low
TCGA-49-AARQ	high
TCGA-53-7813	low
TCGA-44-3918	low
TCGA-64-1681	low
TCGA-55-8620	high
TCGA-64-5774	high
TCGA-97-A4M1	low
TCGA-83-5908	high
TCGA-97-8179	low
TCGA-64-1680	low
TCGA-73-4670	high
TCGA-44-3396	high
TCGA-53-7624	high
TCGA-91-6835	low
TCGA-L9-A50W	low
TCGA-86-7713	high
TCGA-50-5044	high
TCGA-50-6595	high
TCGA-55-7903	low
TCGA-55-8508	high
TCGA-67-3771	high
TCGA-55-A4DG	low
TCGA-91-7771	low
TCGA-91-6849	low
TCGA-64-5781	low
TCGA-97-7552	low
TCGA-91-6829	high
TCGA-49-AARE	high
TCGA-97-7941	high
TCGA-86-7714	low
TCGA-62-8402	high
TCGA-78-7162	low
TCGA-49-AAR0	low
TCGA-35-4122	high
TCGA-55-7726	high
TCGA-62-A46Y	low
TCGA-55-6980	high
TCGA-05-4430	high
TCGA-67-3772	low
TCGA-MP-A4SY	high
TCGA-78-7148	high
TCGA-35-3615	low
TCGA-55-A493	high
TCGA-49-6744	low
TCGA-49-4494	high
TCGA-78-7143	low
TCGA-55-8513	low
TCGA-MP-A4TC	high
TCGA-05-4420	low
TCGA-97-8174	low
TCGA-44-6777	low
TCGA-62-A46P	low
TCGA-55-8089	high
TCGA-MN-A4N5	high
TCGA-49-AAR9	high
TCGA-86-8671	low
TCGA-49-4507	high
TCGA-62-A46V	low
TCGA-05-4389	low
TCGA-50-6592	high
TCGA-91-6831	high
TCGA-55-6987	low
TCGA-49-4510	low
TCGA-86-8672	high
TCGA-44-2668	high
TCGA-93-A4JQ	high
TCGA-97-8177	low
TCGA-05-4396	low
TCGA-55-6978	high
TCGA-69-8453	high
TCGA-50-7109	high
TCGA-49-4501	low
TCGA-50-5049	low
TCGA-78-8660	high
TCGA-91-6828	low
TCGA-50-6590	high
TCGA-97-8176	high
TCGA-50-5935	low
TCGA-55-7281	high
TCGA-49-4488	low
TCGA-NJ-A55A	low
TCGA-95-8494	high
TCGA-64-5775	high
TCGA-97-7547	low
TCGA-44-2655	low
TCGA-05-4390	high
TCGA-86-8674	low
TCGA-49-6742	high
TCGA-44-A47B	high
TCGA-MP-A4SW	low
TCGA-64-5815	high
TCGA-MP-A4T8	high
TCGA-NJ-A4YI	low
TCGA-L4-A4E6	low
TCGA-49-AAR4	high
TCGA-97-A4M3	low
TCGA-05-4397	high
TCGA-55-6984	high
TCGA-05-4427	low
TCGA-44-A4SU	low
TCGA-97-7546	low
TCGA-86-8585	high
TCGA-55-8301	low
TCGA-86-6562	high
TCGA-J2-A4AD	low
TCGA-55-8510	low
TCGA-99-8033	high
TCGA-69-7978	high
TCGA-86-8054	high
TCGA-55-8302	high
TCGA-05-4405	low
TCGA-78-7147	low
TCGA-MP-A4TD	low
TCGA-55-6971	low
TCGA-50-6591	high
TCGA-95-7944	high
TCGA-NJ-A4YF	low
TCGA-55-A48Z	low
TCGA-05-5428	low
TCGA-69-8255	high
TCGA-55-8097	low
TCGA-86-A4D0	high
TCGA-L9-A444	low
TCGA-MP-A4T7	high
TCGA-91-A4BD	low
TCGA-05-4250	high
TCGA-55-7994	high
TCGA-99-8028	low
TCGA-97-8171	low
TCGA-67-6216	high
TCGA-91-6848	high
TCGA-44-2665	high
TCGA-86-7701	low
TCGA-78-7156	low
TCGA-05-5420	low
TCGA-55-6642	high
TCGA-78-7149	low
TCGA-05-4418	high
TCGA-05-4422	low
TCGA-78-7146	high
TCGA-86-A4P8	low
TCGA-67-6217	low
TCGA-78-8640	high
TCGA-44-7670	high
TCGA-49-AARO	high
TCGA-50-5941	high
TCGA-49-AARR	low
TCGA-J2-8192	low
TCGA-64-5779	low
TCGA-62-A46O	high
TCGA-50-8459	high
TCGA-86-A4JF	high
TCGA-05-4249	low
TCGA-J2-A4AG	low
TCGA-86-8280	low
TCGA-78-7166	high
TCGA-91-8499	high
TCGA-71-6725	low
TCGA-69-7980	high
TCGA-L9-A8F4	low
TCGA-05-4433	high
TCGA-55-A492	low
TCGA-73-4675	low
TCGA-50-5936	high
TCGA-44-7662	high
TCGA-78-7154	high
TCGA-73-7498	low
TCGA-50-5933	high
TCGA-55-8507	high
TCGA-S2-AA1A	low
TCGA-95-7948	low
TCGA-67-3774	low
TCGA-38-4628	high
TCGA-50-5051	high
TCGA-86-6851	low
TCGA-44-6148	low
TCGA-MN-A4N1	high
TCGA-05-5429	high
TCGA-55-8091	high
TCGA-44-3917	low
TCGA-49-4505	low
TCGA-62-8397	low
TCGA-50-5942	low
TCGA-55-8206	low
TCGA-55-8094	high
TCGA-05-4382	high
TCGA-05-5423	low
TCGA-78-7167	low
TCGA-J2-8194	high
TCGA-97-A4M0	low
TCGA-38-4632	high
TCGA-44-7661	high
TCGA-55-8205	high
TCGA-05-4424	high
TCGA-38-4631	high
TCGA-55-7283	low
TCGA-95-7567	high
TCGA-38-4629	high
TCGA-91-8497	low
TCGA-78-7540	high
TCGA-55-A48Y	high
TCGA-55-7995	low
TCGA-44-3919	high
TCGA-69-7764	low
TCGA-95-7947	high
TCGA-MP-A4TH	low
TCGA-55-7725	low
TCGA-L9-A5IP	high
TCGA-97-7554	high
TCGA-55-8619	low
TCGA-55-7227	high
TCGA-67-3770	low
TCGA-78-7145	high
TCGA-49-AAR3	high
TCGA-44-A479	low
TCGA-4B-A93V	low
TCGA-78-7633	low
TCGA-NJ-A4YP	high
TCGA-78-7535	high
TCGA-55-6970	low
TCGA-55-6543	high
TCGA-05-4402	high
TCGA-55-1596	high
TCGA-49-4490	high
TCGA-62-A471	high
TCGA-86-A456	low
TCGA-49-4512	low
TCGA-55-A48X	low
TCGA-86-8278	high
TCGA-55-6982	high
TCGA-05-4398	high
TCGA-78-7152	low
TCGA-MP-A4TF	high
TCGA-91-6836	low
TCGA-78-8648	low
TCGA-44-A47A	low
TCGA-55-A57B	low
TCGA-55-8207	low
TCGA-55-7576	high
TCGA-NJ-A55O	low
TCGA-55-A494	high
TCGA-95-7043	low
TCGA-L9-A443	low
TCGA-69-7974	high
TCGA-NJ-A4YG	low
TCGA-69-7760	high
TCGA-49-4486	low
TCGA-93-A4JN	high
TCGA-44-7671	low
TCGA-44-6774	low
TCGA-50-6594	high
TCGA-44-8119	high
TCGA-49-AAR2	low
TCGA-44-6779	high
TCGA-86-8669	low
TCGA-05-5715	high
TCGA-69-A59K	low
TCGA-55-A491	low
TCGA-71-8520	high
TCGA-91-8496	low
TCGA-95-A4VP	low
TCGA-95-8039	high
TCGA-86-8076	low
TCGA-44-2659	low
TCGA-55-8203	low
TCGA-MP-A5C7	low
TCGA-78-7220	high
TCGA-78-7153	low
TCGA-55-7910	low
TCGA-64-5778	low
TCGA-55-7815	low
TCGA-55-6985	high
TCGA-69-7761	high
TCGA-MN-A4N4	high
TCGA-55-6972	low
