# Supplementary material for: Integrative Analysis Constructs an Extracellular Matrix-Associated Gene Signature for the Prediction of Survival and Tumor Immunity in Lung Adenocarcinoma
Source: Front Cell Dev Biol. 2022 Apr 26;10:835043. doi: 10.3389/fcell.2022.835043 (PMC9086365; doi:10.3389/fcell.2022.835043)
Supplement: Supplementary file 8 [file Table1.XLSX]

## Sheet: Sheet1
FRAS1
ECM2
ECM1
MEPE
BMPER
VWF
MUC5B
SSPOP
OTOG
MUC2
OTOGL
MUC5AC
MUC6
ZAN
FCGBP
FREM2
FREM1
FREM3
FAM20C
EFEMP1
EFEMP2
SULF1
SULF2
LACRT
SOD3
MGP
IMPG2
MATN1
MMP23B
MMP20
MXRA5
MMP21
IMPG1
MMP19
MMP28
MMP24
MMP16
MMP15
MMP26
COMP
MMP27
MMP17
MMP25
MMP9
MMP14
MMP10
MXRA7
MMP13
MMP7
MMP11
MXRA8
DMP1
MMP1
MMP2
UCMA
MMP3
HPX
MMP8
MMP12
FAM20A
ABI3BP
SBSPON
C17orf58
EMILIN2
COL6A5
COL6A6
ANGPTL5
MARCOL
EMILIN3
TNXA
NID2
OPTC
MATN4
COL21A1
COL24A1
OLFML2A
TINAGL1
HAPLN1
TECTA
PRG4
AMELY
MATN2
FBN3
FBLN2
DPT
VWA2
HMCN2
LAD1
TNXB
THSD4
COL6A2
COL20A1
LGALS4
TECTB
COL14A1
LINGO4
LRRC3B
LRRC3C
LINGO3
COL4A4
COL9A1
COL10A1
COL23A1
COL9A2
C6orf15
GFOD2
FBLN5
BCAM
LAMB4
FIBCD1
ANGPTL6
ANGPTL2
ZPLD1
GP2
CHADL
SMOC1
TPSAB1
ADAMTS15
COLQ
LYPD5
NID1
PODN
MFAP5
COL25A1
EDIL3
LYPD3
COL12A1
COL15A1
SCUBE3
VWA1
COL13A1
COL17A1
COL5A3
LRRTM4
NYX
EGFL6
LAMC1
VIT
KAZALD1
CCDC80
OIT3
TPSB2
COL27A1
COL11A2
COL9A3
COL4A5
COL8A2
COL19A1
COL4A6
LAMA4
SNORC
MIA
PRELP
LAMB3
TGM4
ANGPTL1
SPON2
CPN2
NTN4
TGFBI
COL18A1
COL6A3
COL6A1
TUFT1
MPZL3
ST7
ZP1
COL26A1
HAPLN2
ADAMTS10
CBLN4
ELN
HAPLN3
LRRN2
CHAD
OTOL1
PRSS1
ADAMTS4
ANGPTL7
PHLDB1
FBN2
CTRB2
CTRB1
MFAP2
MATN3
ASPN
RBP3
PCOLCE
LRRC15
CD248
HMCN1
COL28A1
COL8A1
MFAP4
COL5A2
ADAMTS5
CRELD1
BGN
MEGF9
COL16A1
PRG2
OGN
EYS
ACAN
ADAMTS14
ADAMTSL5
SCARA3
TINAG
TLL1
LTBP2
COL22A1
PXDN
HSPG2
LAMB1
COL11A1
RTBDN
ADAMTSL4
SNED1
CLEC14A
HAPLN4
THBS3
IGFALS
CAPNS1
KLK2
EMILIN1
LAMC2
ADAMTS3
NPNT
VCAN
FBLN7
ICAM4
DSPP
SPARCL1
ADAMTS2
LAMC3
ADAMTSL1
ITGA9
HPSE2
ADAMTS19
ADAMTS17
CAPNS2
ADAMTSL3
ADAMTS6
SERPINB8
ANXA5
OMD
FCN2
ATRN
A1BG
LGALS3BP
ANXA2P2
CTSF
F9
PZP
ANXA11
CILP
MMRN2
MFGE8
CS
COL4A1
FMOD
COL5A1
LAMA3
GFUS
STATH
THBS2
ZP2
MMRN1
ADAMTS8
EGFLAM
AMBN
COLGALT1
TNC
AEBP1
COL1A2
MELTF
FSCN1
LOXL1
ADAMTS20
ADAMDEC1
THSD1
ADAM11
ATRNL1
IBSP
ITGA11
ITGA10
MUC4
ICAM5
SCUBE1
OTOA
DGCR6
CRISPLD2
ENAM
SPON1
SSC5D
ANXA7
S100A6
HRNR
S100A4
ITIH1
ITIH2
LOXL4
LAMB2
LUM
COL4A2
SPARC
CPA3
ZG16
MBL2
TLL2
TFPI2
C1QB
FGL1
EGFL7
KLK4
LAMA2
NTNG1
ITGA2B
IGFBP7
COL3A1
LINGO2
LRRC24
CCN5
LRIG3
LRRN1
LRRN3
LRIG1
VWC2
ADAM19
TNFRSF11B
ADAMTS9
PLEKHA2
ITGB7
HNRNPM
FBN1
ANTXR1
AMELX
ADAM15
COL7A1
COL2A1
CTSS
FBLN1
A2M
HTRA1
LAMA5
LTBP3
PLOD3
PLG
LTBP1
RRAS
KIF9
ADAMTSL2
FGFBP3
SH3PXD2B
SERAC1
NOXO1
MADCAM1
ALPL
BMP1
CTSV
GSTK1
SERPINH1
PRSS2
CCL28
SRPX
ALDH2
AHCTF1
LYVE1
BTD
MDH2
GRHPR
CST3
ITGB4
CPB2
S100A10
EPYC
STRCP1
MUC17
KLKB1
MYH11
DPP4
ICAM3
ITGAE
MSLN
ITGAD
CLASP2
NDP
SRPX2
ADAMTS13
NCAN
ANGPTL4
INHBE
GPC5
F13A1
BCAN
ANXA4
ORM1
ORM2
ENTPD2
SERPINB1
CSTB
CLEC3B
ITIH4
DMBT1
UMODL1
PHLDB2
SLK
PLET1
DDR1
CLASP1
CMA1
LAMA1
SMOC2
NTN3
NTN5
ITGA7
AMTN
TMEFF1
LMAN1L
ITIH5
FLG
COCH
SDC3
RELL2
RTN4RL2
VASN
POSTN
DAG1
APLP1
WNT2B
HAS3
MUC3A
VTN
FGG
FAP
NTNG2
FGL2
GPC1
ADAMTS18
FKBP10
EXOC8
ADAMTS16
PAPLN
ADAMTS7
AGRN
CEACAM6
ADTRP
UTRN
ALDH1L2
ECH1
MPST
GSR
FH
ALDH7A1
PEX1
SSBP1
HAS1
CTSK
KLK7
PRG3
PLAU
RIC1
TRIL
ELFN2
LRRC17
KERA
CRISP3
LINGO1
CCN6
GPM6B
P3H1
CARMIL2
TTR
PDPN
DDR2
DEFB118
ITGBL1
EPDR1
LCP1
SERPINC1
ITGB8
QSOX1
CAPN1
FLRT2
C1QC
ANOS1
GDF10
HDGF
GPC2
SERPINB12
C1QA
FCN3
PCSK6
CFP
TNR
COL4A3
CTSG
TIMP1
CTSL
CD151
CLC
P3H2
SERPINB5
PHOSPHO1
CRTAP
LTBP4
IDH2
CTHRC1
MYOC
THBS4
SERPINA5
SLPI
TGM2
ANXA6
KRT1
ITGB5
SERPINA3
SERPINA1
PRTN3
AMBP
AZGP1
SERPINB6
CTSD
WNT5B
CTSB
LMAN1
GPC4
DEFA1
F12
ITGAL
PSAP
FN1
GLG1
GP1BA
RTN4RL1
FGB
FGA
ITGA4
MFAP1
PMPCA
SH3PXD2A
NDUFAF7
P3H4
MTHFD2
DCN
SPP2
SPOCK2
TNN
ANGPTL3
ADAMTS1
COL1A1
CD180
LRRTM1
ELFN1
ADAM12
CDH13
HAS2
TIMP2
ITGA1
SUCLA2
NUDT9
GARS1
HSPE1
ACOT11
COASY
CFL2
TUFM
FERMT3
NAXE
PPFIA2
SERPINE1
DAND5
NBL1
CBLN1
NDNF
TMPRSS6
PRDX5
KLK5
PTPRA
ITGA3
LGALS1
APOD
FGFR4
ADAMTS12
VCAM1
SDC2
ITGA8
TMEFF2
DST
NCAM1
ANXA8
USH2A
CCN2
LAMP2
SPINT1
NRROS
PRDX4
MYO1E
NPHS1
ACHE
TIE1
SOST
SEMA3B
ANGPT2
FCN1
MST1
LEFTY2
TIMP3
WNT8A
GPC6
SPP1
OVGP1
ICAM2
TST
MRPL18
GAS2
RIC8A
CCN1
LOX
LOXL2
CASK
L1CAM
CCL25
OC90
BCKDHB
ADGRG6
SIGLEC1
POMZP3
WNT6
RPSA
ADGRG1
GDF15
HPN
BSG
CAPN2
TNFRSF1A
BST1
HRG
SERPINF2
ITGB1
COLEC12
TIMP4
LRRTM3
PI3
FLRT1
TNFRSF1B
HSD17B12
SERPINB9
SERPING1
HSP90B1
KNG1
SERPINF1
CTSC
CHI3L1
CSPG4
APOH
APCS
APOC3
AHSG
CTSZ
CD44
LGALS3
RGCC
SDC4
HADH
KRT8
CFL1
CLIC4
BCR
ACSM1
TOMM70
EPHX2
ACAT1
CD63
GOT2
RIDA
CRYM
ACR
ELANE
TGFB1
ADAM9
SERPINE2
MINK1
AGT
ETS1
THBS1
ITGAV
ITGB6
DNAJC15
NUDT1
OXCT1
FERMT1
ZP4
TXN2
CSGALNACT1
BLOC1S1
HSPA1L
MPV17
ATXN1L
CER1
F7
VCL
RARRES2
GH1
PTX3
ACTG1
PKHD1
SPACA3
PKM
FURIN
ADAM10
FLOT1
ZP3
S100A8
S100A9
CTSH
APOA4
PLSCR1
B4GALT1
PECAM1
F11R
CD47
CDH1
SLC12A2
UMOD
F3
IL7
FGF9
CD34
S100A7
JAM3
WNT2
ANGPT4
SEMA7A
LRP1
ITGB3
CCN3
LRRC32
CCBE1
LRIG2
CCN4
RECK
SPINT2
PF4
ITGA2
TGFB1I1
MYF5
SEMA3E
FAM107A
WNT3
CAD
GREM1
WASHC1
ITGA6
RAMP2
TMEM38B
NTN1
CREB3L1
TCF15
SLC2A10
IHH
CHMP1A
VIM
ATP5F1B
VDAC1
SHMT2
BASP1
HSPA9
IDE
ACTN1
RUVBL1
FABP1
HNRNPA2B1
IDH1
ACTN3
NUMA1
ATP5F1A
SPTBN4
SFRP1
HLCS
GNPAT
OTC
ICAM1
ANG
NOTCH1
ITGAM
EDA
NFKB2
JAM2
POMT1
PDK2
GLRX2
PDK4
ITGAX
ERO1A
WNT4
GLUD1
THY1
JUP
IQGAP1
PTPRJ
SMPD3
NPPA
IFNA2
ITGB2
ANGPT1
CXCL12
ANXA2
CALR
F2
SMAD3
KDR
CDON
ERBIN
HPSE
LOXL3
NF1
TGFBR3
SOD2
CAT
IL6
CD200
CFLAR
RUNX1
BMP2
SFRP2
GAS6
CIB1
PSMA6
ACTN2
RUVBL2
CCL21
PKD1
ENG
SLC25A5
UQCC2
ARL2
ARL2BP
RAC1
PRKCZ
GPLD1
FLRT3
SPINK5
BCAS3
DMTN
PCK2
ANXA1
CSF1
PDGFB
ADIPOQ
TGFB2
ADAM8
GSTP1
SOX9
JAG1
CD3E
TFIP11
HAT1
ACAA1
APOA1
TGFB3
EPHA3
GPC3
CDH2
PDGFA
EFNA5
ALOX5
SLC9A1
DLG1
CLU
TSC1
WNT7A
SLIT2
SLC39A8
ITGA5
NOX1
KARS1
ELF3
FOXF2
FOXO3
SIRT4
SIRT3
MDK
PTN
RB1
FGF1
FZD4
CDK1
HSPD1
BMP7
RHOA
TEK
VEGFA
APOE
WNT11
WNT3A
LRP5
LGALS9
FGF10
ERCC2
SCX
CAV2
FOXF1
EXT1
CYP1B1
BCL3
SRC
ABL1
NRP1
CX3CL1
CPS1
TYMS
OGG1
TENM1
DNMT3A
SOD1
TLR2
TLR3
SHH
ATP7A
WNT5A
CD4
SNW1
NOS2
ROCK1
RPS3
PRKCD
FGFR2
CD36
FGF2
FOXC1
C1QBP
FOXC2
PDGFRA
WT1
NR2E1
FER
NLGN1
TIAM1
APP
LRRK2
PARK7
TLR4
PTEN
BAX
ERBB4
SRF
TGFBR1
TNF
PTK2B
TP53
BCL2
CAV1
