# Supplementary material for: Integrative Analysis Constructs an Extracellular Matrix-Associated Gene Signature for the Prediction of Survival and Tumor Immunity in Lung Adenocarcinoma
Source: Front Cell Dev Biol. 2022 Apr 26;10:835043. doi: 10.3389/fcell.2022.835043 (PMC9086365; doi:10.3389/fcell.2022.835043)
Supplement: Supplementary file 9 [file Table5.XLSX]

## Sheet: Sheet1
id	risk
GSM1019138	low
GSM1019139	low
GSM1019140	low
GSM1019141	high
GSM1019142	high
GSM1019143	low
GSM1019144	high
GSM1019145	high
GSM1019146	high
GSM1019147	low
GSM1019148	high
GSM1019149	low
GSM1019150	high
GSM1019151	low
GSM1019152	high
GSM1019153	low
GSM1019154	high
GSM1019155	high
GSM1019156	high
GSM1019157	high
GSM1019158	high
GSM1019159	high
GSM1019160	low
GSM1019161	high
GSM1019162	high
GSM1019163	high
GSM1019164	high
GSM1019165	high
GSM1019166	low
GSM1019167	high
GSM1019168	high
GSM1019169	high
GSM1019170	high
GSM1019171	low
GSM1019172	high
GSM1019173	high
GSM1019174	high
GSM1019175	low
GSM1019176	high
GSM1019177	high
GSM1019178	high
GSM1019179	high
GSM1019180	high
GSM1019181	high
GSM1019182	high
GSM1019183	high
GSM1019184	high
GSM1019185	low
GSM1019186	low
GSM1019187	high
GSM1019188	low
GSM1019189	high
GSM1019190	low
GSM1019191	high
GSM1019192	high
GSM1019193	high
GSM1019194	high
GSM1019195	low
GSM1019196	low
GSM1019197	high
GSM1019198	high
GSM1019199	low
GSM1019200	low
GSM1019201	high
GSM1019202	high
GSM1019203	high
GSM1019204	high
GSM1019205	high
GSM1019206	low
GSM1019207	high
GSM1019208	high
GSM1019209	high
GSM1019210	high
GSM1019211	high
GSM1019212	high
GSM1019213	high
GSM1019214	low
GSM1019215	high
GSM1019216	high
GSM1019217	high
GSM1019218	high
GSM1019219	high
GSM1019220	high
GSM1019221	high
GSM1019222	high
GSM1019223	high
GSM1019224	high
GSM1019225	high
GSM1019226	high
GSM1019227	high
GSM1019228	high
GSM1019229	high
GSM1019230	high
GSM1019231	low
GSM1019232	high
GSM1019233	high
GSM1019234	high
GSM1019235	high
GSM1019236	high
GSM1019237	low
GSM1019238	low
GSM1019239	high
GSM1019240	high
GSM1019241	low
GSM1019242	low
GSM1019243	low
GSM1019244	low
GSM1019245	low
GSM1019246	low
GSM1019247	low
GSM1019248	low
GSM1019249	low
GSM1019250	high
GSM1019251	low
GSM1019252	low
GSM1019253	low
GSM1019254	low
GSM1019255	low
GSM1019256	high
GSM1019257	low
GSM1019258	low
GSM1019259	low
GSM1019260	low
GSM1019261	low
GSM1019262	low
GSM1019263	high
GSM1019264	low
GSM1019265	low
GSM1019266	low
GSM1019267	low
GSM1019268	low
GSM1019269	low
GSM1019270	low
GSM1019271	high
GSM1019272	low
GSM1019273	high
GSM1019274	low
GSM1019275	low
GSM1019276	high
GSM1019277	low
GSM1019278	low
GSM1019279	low
GSM1019280	low
GSM1019281	low
GSM1019282	high
GSM1019283	high
GSM1019284	low
GSM1019285	low
GSM1019286	high
GSM1019287	high
GSM1019288	low
GSM1019289	high
GSM1019290	low
GSM1019291	low
GSM1019292	low
GSM1019293	low
GSM1019294	low
GSM1019295	low
GSM1019296	high
GSM1019297	high
GSM1019298	low
GSM1019299	low
GSM1019300	low
GSM1019301	low
GSM1019302	low
GSM1019303	high
GSM1019304	low
GSM1019305	low
GSM1019306	high
GSM1019307	low
GSM1019308	low
GSM1019309	low
GSM1019310	low
GSM1019311	low
GSM1019312	low
GSM1019313	high
GSM1019314	low
GSM1019315	low
GSM1019316	low
GSM1019317	low
GSM1019318	low
GSM1019319	high
GSM1019320	low
GSM1019321	high
GSM1019322	high
GSM1019323	high
GSM1019324	high
GSM1019325	high
GSM1019326	low
GSM1019327	low
GSM1019328	high
GSM1019329	low
GSM1019330	low
GSM1019331	low
GSM1019332	low
GSM1019333	high
